# Supplementary material for: An ionic liquid as an interface modulator for highly efficient and stable perovskite solar cells
Source: Royal Society of Chemistry journal article supplement (doi:10.1039/d2se01535h), 2023-01-01
Supplement: d2se01535h1.pdf [file d2se01535h1.pdf]

## Ionic liquid as modulate interface for high-efficient and stable perovskite solar cells

Xiang Chen,<sup>a</sup> Lixin Song,<sup>\*a</sup> Ningxia Gu,<sup>a</sup> Pengyun Zhang,<sup>a</sup> Lei Ning,<sup>a</sup> Pingfan Du,<sup>a</sup> Fengfeng Chen,<sup>b</sup> and Jie Xiong<sup>\*a, b</sup>

*a* College of Textile Science and Engineering, *b* School of Materials Science & Engineering,  
Zhejiang Sci-Tech University, Hangzhou, 310018, China. E-mail: [jxiong@zstu.edu.cn](mailto:jxiong@zstu.edu.cn),  
[lsxong@zstu.edu.cn](mailto:lsxong@zstu.edu.cn)

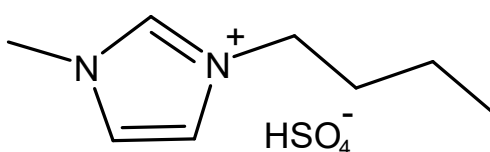

Fig.S1 Chemical structure of BMIMHSO<sub>4</sub> molecule.

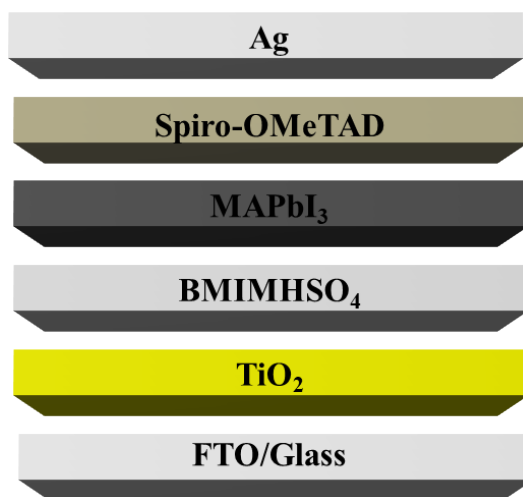

Fig.S2 Device structure of the PSCs.

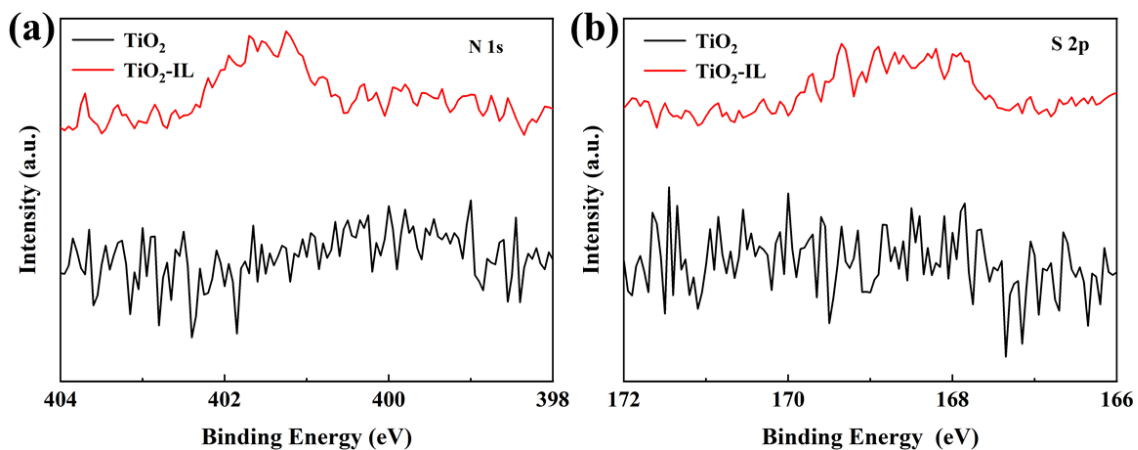

Fig.S3 The high-resolution XPS spectra of (a) N and (b) S element.

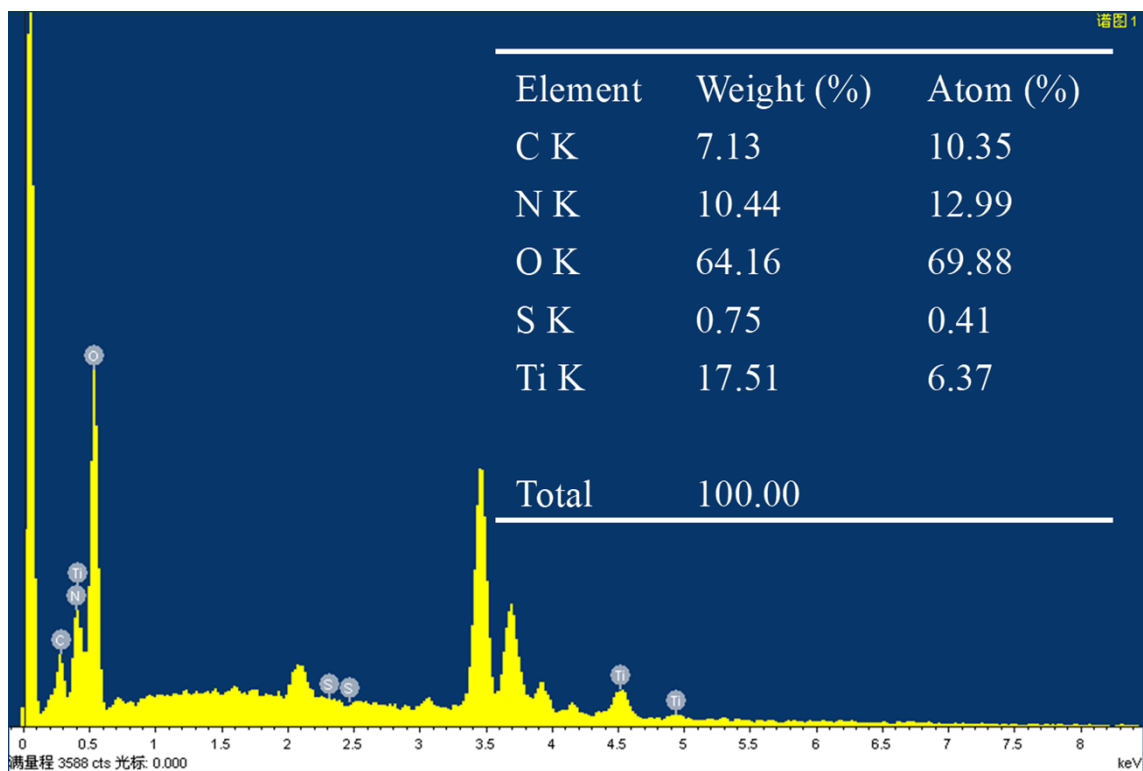

Fig.S4 The EDS measurement of TiO<sub>2</sub>-IL sample with the top-right showing the detail element analysis.

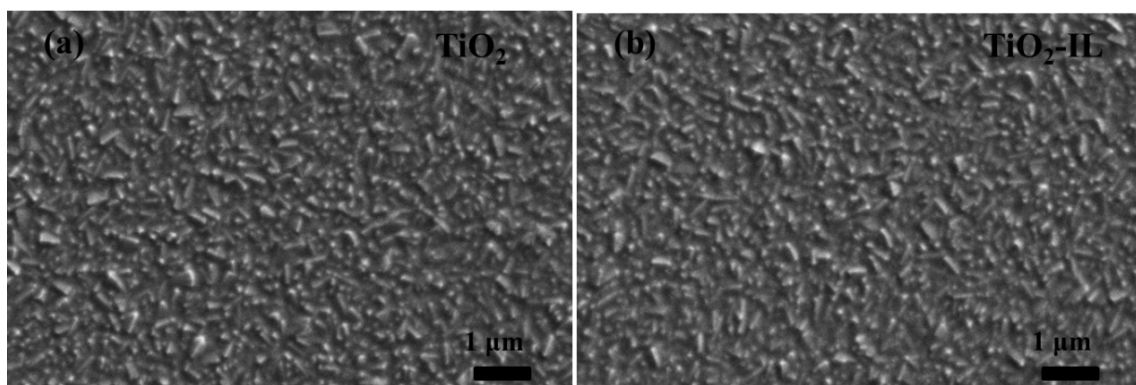

Fig.S5 The SEM images of (a) TiO<sub>2</sub> and (b) TiO<sub>2</sub>-IL film.

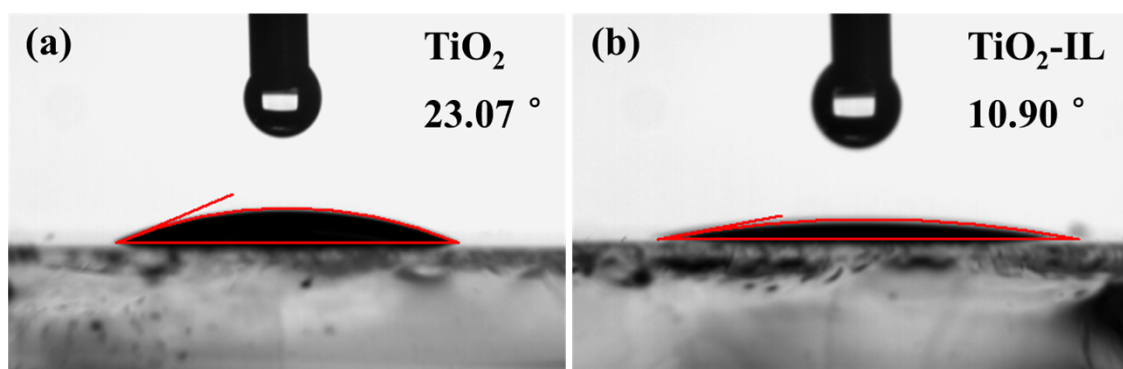

Fig.S6 Contact angle performance using DMSO solvent of (a) TiO<sub>2</sub> and (b) TiO<sub>2</sub> film.

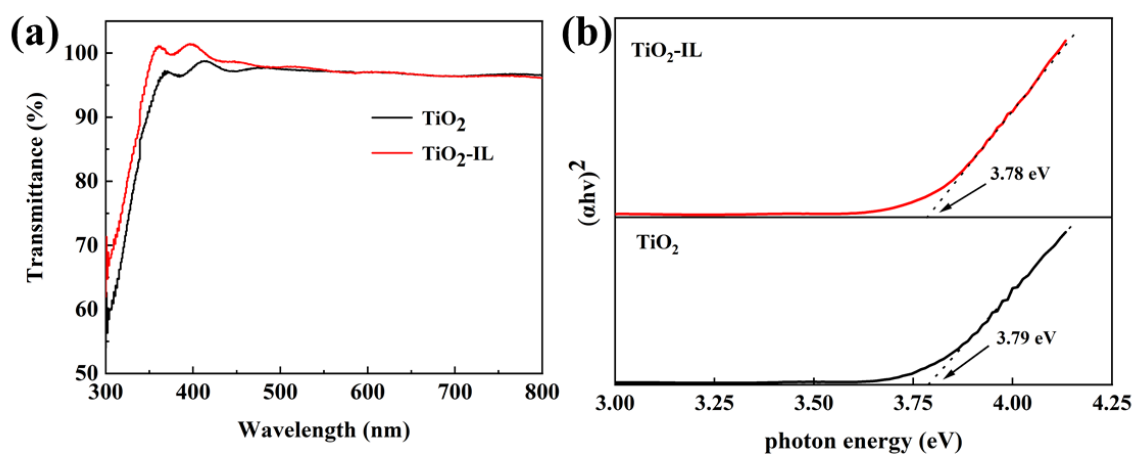

Fig.S7 (a)Transmission spectra and (b) Tauc plot of absorption spectra of TiO<sub>2</sub> and TiO<sub>2</sub>-IL film.

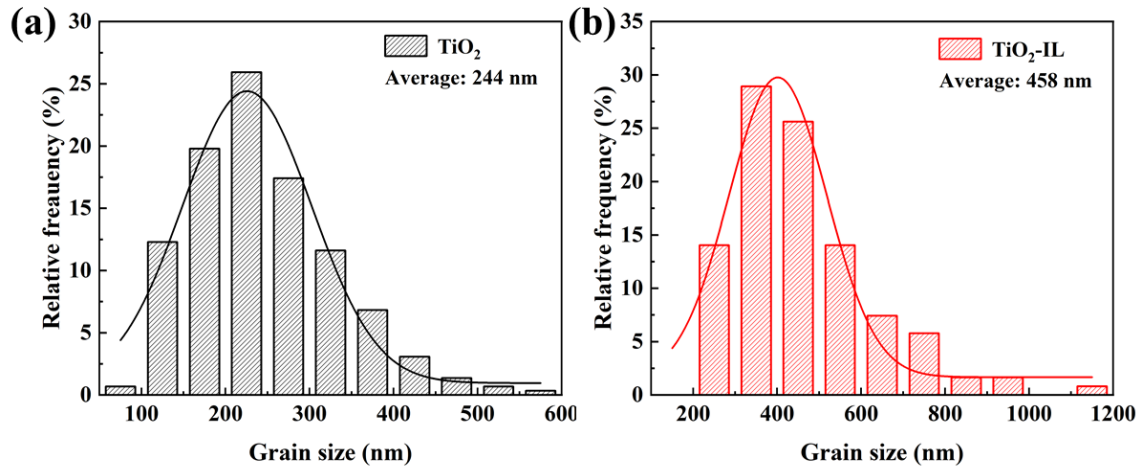

Fig.S8 The grain size distribution histograms of (a) TiO<sub>2</sub>-based and (b) TiO<sub>2</sub>-IL-based perovskite film.

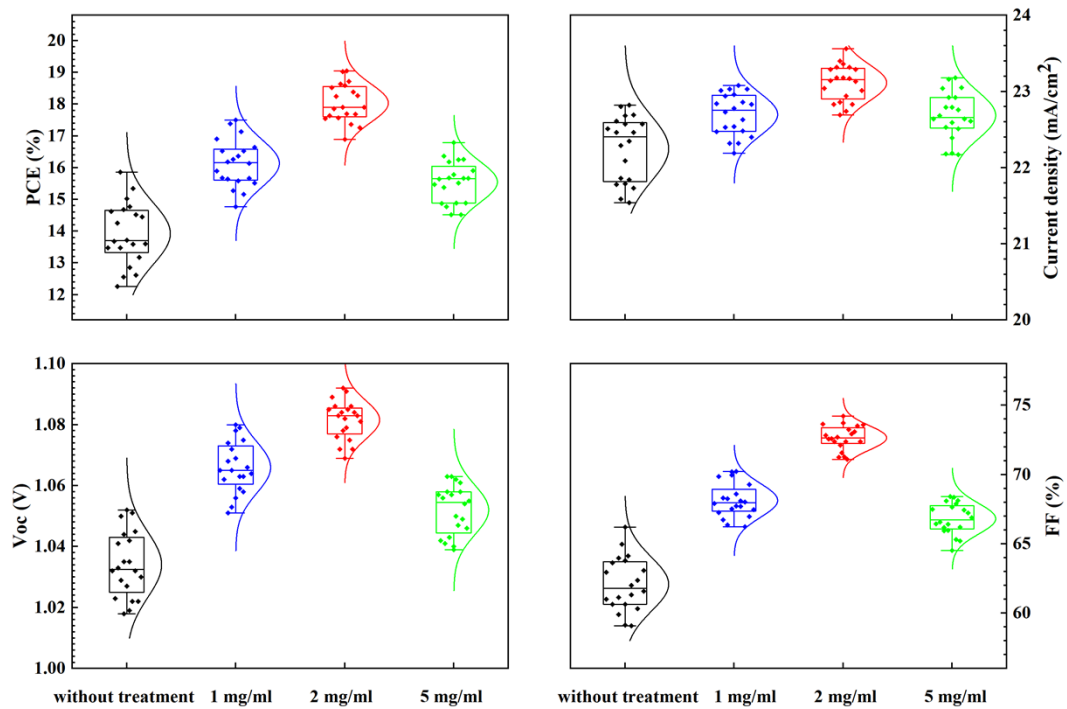

Fig.S9 Statistics on photovoltaic parameters for studied PSCs at various IL concentrations. J-V curves collected at 1 sun irradiation are utilized to derive parameters. A box is used to illustrate the standard error. Twenty devices with a cell active area of 0.06 cm<sup>2</sup> were fabricated for each PSC structure.

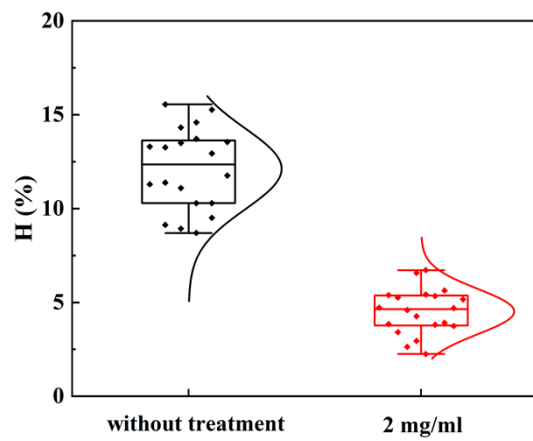

Fig.S10 Hysteresis index of twenty devices.

Table S1 The electron mobility and conductivity parameters based on two ETL.

| Samples              | Mobility ( $\text{cm}^2 \text{V}^{-1} \text{S}^{-1}$ ) | Conductivity ( $\text{mS cm}^{-1}$ ) |
|----------------------|--------------------------------------------------------|--------------------------------------|
| TiO <sub>2</sub>     | $1.43 \times 10^{-7}$                                  | $1.27 \times 10^{-3}$                |
| TiO <sub>2</sub> -IL | $4.88 \times 10^{-7}$                                  | $1.93 \times 10^{-3}$                |

Table S2 Photovoltaic parameters of PSCs based on TiO<sub>2</sub>-IL with different concentrations.

| Samples           | Jsc ( $\text{mA cm}^{-2}$ ) | Voc (V) | FF (%) | PCE (%) |
|-------------------|-----------------------------|---------|--------|---------|
| Without treatment | 22.82                       | 1.05    | 66.20  | 15.92   |
| 1 mg/ml           | 23.08                       | 1.08    | 70.23  | 17.56   |
| 2 mg/ml           | 23.56                       | 1.09    | 74.21  | 19.13   |
| 5 mg/ml           | 23.18                       | 1.06    | 68.36  | 16.83   |

Table S3 Photovoltaic parameters measured at different scan directions of the champion PSCs based on the 0 mg/ml and 2 mg/ml IL concentration devices.

| Samples           | Scan direction | Jsc ( $\text{mA cm}^{-2}$ ) | Voc (V) | FF (%) | PCE (%) | H (%) |
|-------------------|----------------|-----------------------------|---------|--------|---------|-------|
| Without treatment | Reverse        | 22.82                       | 1.05    | 66.20  | 15.92   | 8.70  |
|                   | Forward        | 22.55                       | 1.04    | 61.76  | 14.53   |       |
| 2 mg/ml           | Reverse        | 23.56                       | 1.09    | 74.21  | 19.13   | 2.40  |
|                   | Forward        | 23.45                       | 1.09    | 72.86  | 18.67   |       |

Table S4. The fitting parameters of TRPL of perovskite film for growing on TiO<sub>2</sub> and TiO<sub>2</sub>-IL substrates.

| Samples              | A <sub>1</sub> | τ <sub>1</sub> (ns) | A <sub>2</sub> | τ <sub>2</sub> (ns) | τ <sub>avg</sub> (ns) |
|----------------------|----------------|---------------------|----------------|---------------------|-----------------------|
| TiO <sub>2</sub>     | 1.12           | 6.53                | 0.25           | 212.79              | 187.86                |
| TiO <sub>2</sub> -IL | 1.89           | 2.64                | 0.57           | 23.55               | 17.88                 |

Table S5 the electron trap density was calculated by SCLC measures of the deposited on TiO<sub>2</sub> film and TiO<sub>2</sub>-IL film devices.

| Samples              | V <sub>TFL</sub> (V) | N <sub>trap</sub> (cm <sup>-3</sup> ) |
|----------------------|----------------------|---------------------------------------|
| TiO <sub>2</sub>     | 0.683                | 1.20 × 10 <sup>14</sup>               |
| TiO <sub>2</sub> -IL | 0.475                | 0.83 × 10 <sup>14</sup>               |

Table S6 EIS parameters of PSCs based on TiO<sub>2</sub> and TiO<sub>2</sub>-IL devices.

| Samples              | R <sub>s</sub> (Ω) | R <sub>rc</sub> (Ω) |
|----------------------|--------------------|---------------------|
| TiO <sub>2</sub>     | 30.48              | 12388.32            |
| TiO <sub>2</sub> -IL | 22.31              | 17704.03            |

Table S7 summarized the stability research about BMIMHSO<sub>4</sub> IL with other ILs.

| Ionic liquid | Perovskite | PCE (%) | Decrease in stability (%) after hours | Ref |
|--------------|------------|---------|---------------------------------------|-----|
|              |            |         |                                       |     |

---

|                                               |                                                                                              |       |                                                                                                                  |           |
|-----------------------------------------------|----------------------------------------------------------------------------------------------|-------|------------------------------------------------------------------------------------------------------------------|-----------|
| MAAc                                          | CsPbIBr <sub>2</sub>                                                                         | 8.85  | Air( room temperature), remains 82% of initial PCE after 30 days.                                                | 1         |
| BMIMPF <sub>6</sub>                           | CsPbI <sub>2</sub> Br                                                                        | 13.19 | Air( 20 °C, ~20% RH), remains 91% of initial PCE after 60 days.                                                  | 2         |
| FBABF <sub>4</sub>                            | (FAPbI <sub>3</sub> ) <sub>1-x</sub> (MAPbBr <sub>3</sub> ) <sub>x</sub>                     | 23.07 | Air( 35±5% RH), remains 85% of initial PCE after 3000h.                                                          | 3         |
| N(CH <sub>3</sub> ) <sub>4</sub> OH<br>(TMAH) | FA <sub>0.75</sub> MA <sub>0.25</sub> PbI <sub>2.5</sub> Br <sub>0.5</sub>                   | 20.28 | Desiccator( ~15% RH), remains 97% of initial PCE after 360h.                                                     | 4         |
| BMIMBF <sub>4</sub>                           | MAPbI <sub>3</sub>                                                                           | 19.62 | Air( AM 1.5G illumination), remains 85% of initial PCE after 240 min.                                            | 5         |
| BMIMBF <sub>4</sub>                           | FA <sub>0.83</sub> MA <sub>0.17</sub> Pb(I <sub>0.83</sub> Br <sub>0.17</sub> ) <sub>3</sub> | 20.80 | Air( 85 °C, dark, under 45% RH), remains less than 50% of initial PCE after 800h.                                | 6         |
| EMIMI                                         | MAPbI <sub>3</sub>                                                                           | 14.59 | Dry air( RH<5%), remains 93% of initial PCE after 360h; air ( 30-40% RH), remains 51% of initial PCE after 360h. | 7         |
| [EMIM]PF <sub>6</sub>                         | MAPbI <sub>3</sub>                                                                           | 13.50 | Air, remains 93.5% of initial PCE after 45 days.                                                                 | 8         |
| MAAc                                          | MAPbI <sub>3</sub>                                                                           | 21.08 | Light, N <sub>2</sub> -filled glovebox, remains 86% of initial PCE after 400h.                                   | 9         |
| BMIMHSO <sub>4</sub>                          | MAPbI <sub>3</sub>                                                                           | 19.13 | Air( ~40% RH, 25±5°C, dark), remains 90% of initial PCE after 600h.                                              | This work |

---



## Reference

1. L. Shi, H. Yuan, X. Sun, X. Li, W. Zhu, J. Wang, L. Duan, Q. Li, Z. Zhou, Z. Huang, X. Ban and D. Zhang, *ACS Appl. Energy Mater.*, 2021, **4**, 10584-10592.
2. R. Yin, K.-X. Wang, S. Cui, B.-B. Fan, J.-W. Liu, Y.-K. Gao, T.-T. You and P.-G. Yin, *ACS Appl. Energy Mater.*, 2021, **4**, 9294-9303.
3. D. Gao, L. Yang, X. Ma, X. Shang, C. Wang, M. Li, X. Zhuang, B. Zhang, H. Song, J. Chen and C. Chen, *J. Energy Chem.*, 2022, **69**, 659-666.
4. C. Huang, P. Lin, N. Fu, K. Sun, M. Ye, C. Liu, X. Zhou, L. Shu, X. Hao, B. Xu, X. Zeng, Y. Wang and S. Ke, *J. Mater. Chem. A*, 2018, **6**, 22086-22095.
5. D. Yang, X. Zhou, R. Yang, Z. Yang, W. Yu, X. Wang, C. Li, S. Liu and R. P. H. Chang, *Energy Environ. Sci.*, 2016, **9**, 3071-3078.
6. N. K. Noel, S. N. Habisreutinger, A. Pellaroque, F. Pulvirenti, B. Wenger, F. Zhang, Y.-H. Lin, O. G. Reid, J. Leisen, Y. Zhang, S. Barlow, S. R. Marder, A. Kahn, H. J. Snaith, C. B. Arnold and B. P. Rand, *Energy Environ. Sci.*, 2019, **12**, 3063-3073.
7. J. Xu, X. Shi, J. Chen, J. Luan and J. Yao, *J Solid State Chem*, 2019, **276**, 302-308.
8. W. Zhang, Z. Ren, Y. Guo, X. He and X. Li, *Electrochim. Acta*, 2018, **268**, 539-545.
9. D. Li, L. Chao, C. Chen, X. Ran, Y. Wang, T. Niu, S. Lv, H. Wu, Y. Xia, C. Ran, L. Song, S. Chen, Y. Chen and W. Huang, *Nano Lett.*, 2020, **20**, 5799-5806.
